# Supplementary material for: Conserved Structural Domains in FoxD4L1, a Neural Forkhead Box Transcription Factor, Are Required to Repress or Activate Target Genes
Source: PLoS One. 2013 Apr 16;8(4):e61845. doi: 10.1371/journal.pone.0061845 (PMC3627651; doi:10.1371/journal.pone.0061845)
Supplement: Table S1 — Gene and protein accession numbers for vertebrate FoxD4L1. (XLSX) [file pone.0061845.s007.xlsx]

## Sheet: Sheet1
Protein name	Species	Accession number (gene)	Accession number (protein)	Accession number (NCBI)
FoxD4L1	Zebrafish	ENSDARG00000042485	ENSDARP00000062302
FoxD4L1	Medaka	ENSORLG00000004464	ENSORLP00000005601
FoxD4L1	Tetraodon	ENSTNIG00000017601	ENSTNIP00000020747
FoxD4L1	Stickback	ENSGACG00000007103	ENSGACG00000007103
FoxD4L1.1 (FoxD4L1B)	Xenopus tropicalis	ENSXETG00000001667	ENSXETP00000003507
FoxD4L1.2 (FoxD4L1A)	Xenopus tropicalis	ENST00000306507	ENSXETG00000001668
FoxD4L1A	Xenopus laevis			NP_001081998.1
FoxD4L1B	Xenopus laevis			NP_001081722.1
FoxD4L1C	Xenopus laevis			148227156
FoxD4L1	Opossum	ENSMODG00000024854	ENSMODP00000035906
FoxD4L1	Human	ENST00000306507	ENSP00000302756
FoxD4L1	Mouse	ENSMUST00000058600	ENSMUSP00000058575
FoxD4L1	Macacca	ENSMMUG00000023182	ENSMMUP00000039115
FoxD4L1	Pig	ENSSSCG00000005242	ENSSSCP00000005634
